# Supplementary material for: Molecular recognitive adsorption of aqueous tetramethylammonium on the organic derivative of Hiroshima University Silicate-1 with a silane coupling reagent
Source: Royal Society of Chemistry journal article supplement (doi:10.1039/c2cc32743k), 2012-01-01
Supplement: c2cc32743k.pdf [file c2cc32743k.pdf]

## Electronic Supplementary Information

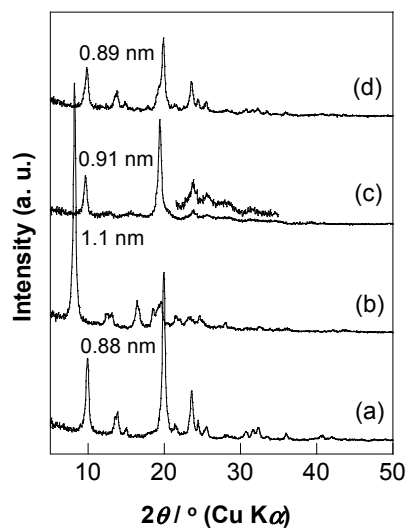

**Fig. S1** XRD patterns of (a) HUS-1, DMS-HUS (b) before and (c) after washing, and (d) DMS-TMA-HUS.

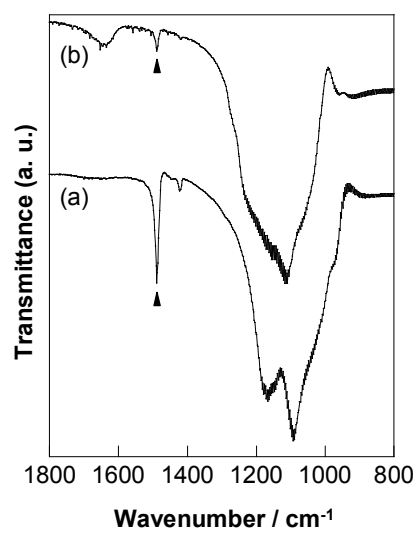

**Fig. S2** FT-IR spectra of (a) HUS-1 and (b) DMS-HUS.

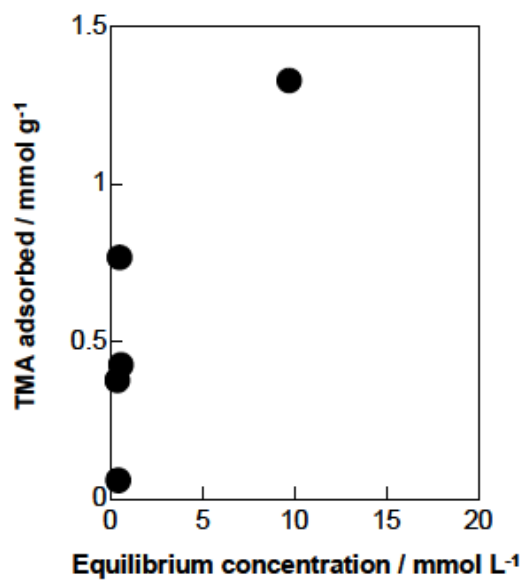

**Fig. S3** Adsorption isotherm of TMA from water on DMS-TMA-HUS.
